# Supplementary material for: Towards Understanding the Lymph Node Response to Skin Infection with Saprophytic Staphylococcus epidermidis
Source: MDPI journal article supplement (doi:10.3390/biomedicines10051021), 2022-04-28
Supplement: s1 [file s1]

**Table S1.** Antibodies used for immunocytochemistry and immunohistology.

| CD (antigen)      | Rat, clone | Manufacturer | Concentration | Dilution   |
|-------------------|------------|--------------|---------------|------------|
| CD43              | W3/13      | S            | 1.0 mg/ml     | 1:100      |
| CD4               | W3/25      | S            | 1.0 mg/ml     | 1:100      |
| CD4 FITC          | W3/25      | S            | 0.1 mg/ml     | 1:100      |
| CD4 PECy-5        | OX35       | BD           | 0.2 mg/ml     | 1:100      |
| CD8               | OX8        | S            | 1.0 mg/ml     | 1:100      |
| CD8a PerCP        | OX8        | BD           | 0.1 mg/ml     | 1:100      |
| B                 | RLN-9D3    | S            | 1.0 mg/ml     | 1:100      |
| Ig k-chain        | OX12       | S            | 1.0 mg/ml     | 1:100      |
| CD45RA            | OX33       | S            | 1.0 mg/ml     | 1:100      |
| CD25 PE           | OX39       | BD           | 0.2 mg/ml     | 1:100      |
| -                 | OX62       | S            | 0.1 mg/ml     | 1:30       |
| CD68              | ED1        | S            | 0.1 mg/ml     | 1:70-1:100 |
| CD68 PE           | ED1        | S            | 0.1 mg/ml     | 1:50       |
| CD31 (PECAM-1)    | TLD-3A12   | S            | 1.0 mg/ml     | 1:50       |
| -                 | HiS48      | S            | na            | 1:100      |
| CD90              | OX7        | S            | 1.0 mg/ml     | 1:100      |
| MHC CLASS II RT1B | OX6        | S            | 1.0 mg/ml     | 1:100      |
| MHC CLASS II RT1B | OX6 FITC   | S            | 1.0 mg/ml     | 1:100      |
| CD54 (ICAM-1)     | 1A29       | S            | 1.0 mg/ml     | 1:50       |
| CD19 PE           | R-20       | SCB          | 1.0 mg/ml     | 1:100      |
| CD27              | LG.3A10    | BD           | 0.1 mg/ml     | 1:100      |
| CD45RC PE         | OX22       | BD           | 0.2 mg/ml     | 1:100      |
| CD62L FITC        | OX85       | S            | 1.0 mg/ml     | 1:100      |
| IgG1              | -          | S            | 0.1 mg/ml     | 1:10       |
| IgG2a             | -          | S            | 0.1 mg/ml     | 1:10       |
| IgG1 PE           | R3-34      | BD           | 0.1 mg/ml     | 1:10       |
| IgG1 FITC         | R3-34      | BD           | 0.1 mg/ml     | 1:10       |
| IgG1 PerCP        | RTK2071    | BL           | 0.2 mg/ml     | 1:10       |
| IgG2a PE Cy-5     | R35-95     | BD           | 0.2 mg/ml     | 1:10       |
| IgG PE            | Poly24030  | BL           | 0.1 mg/ml     | 1:10       |
| IgG FITC          | HTK888     | BL           | 0.5 mg/ml     | 1:10       |

S: Serotec Ltd, Kidlington, United Kingdom; BD: Becton Dickinson Biosciences Pharmingen, San Jose, CA, USA; SCB: Santa Cruz Biotechnology, Dallas, TX, USA; BL: Bio Legend, San Diego, CA, USA.

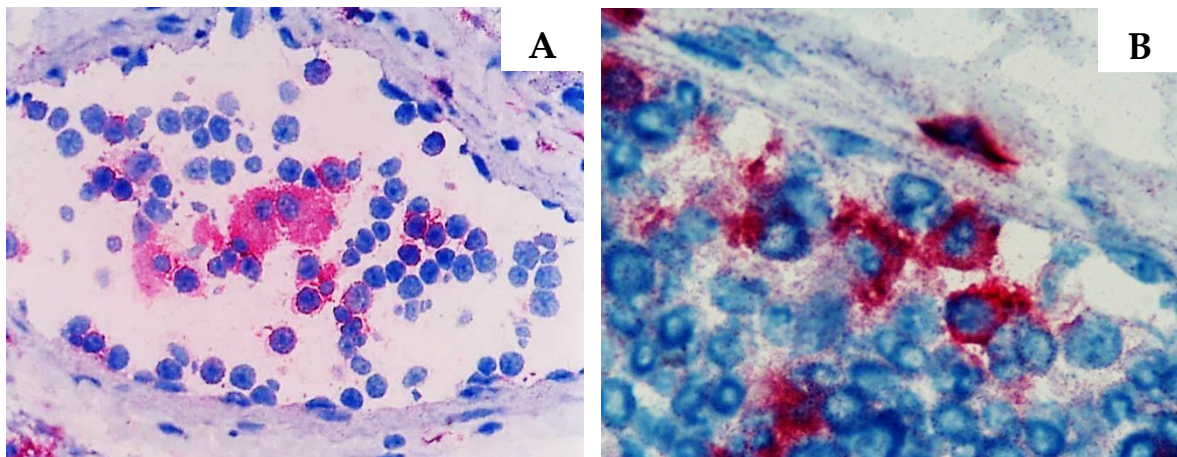

**Figure S1.** Afferent lymphatics and subcapsular sinus of the rat popliteal lymph node in initial massive *S. epidermidis* infection (days 1-7) with early node's evaluation (day 8). A: T helper lymphocytes and monocytes (CD4+, red) entering the popliteal lymph node via afferent lymphatics, magnification 600 x. B: Migrating dendritic cells (OX62+, red) in the subcapsular sinus, magnification 1000 x.

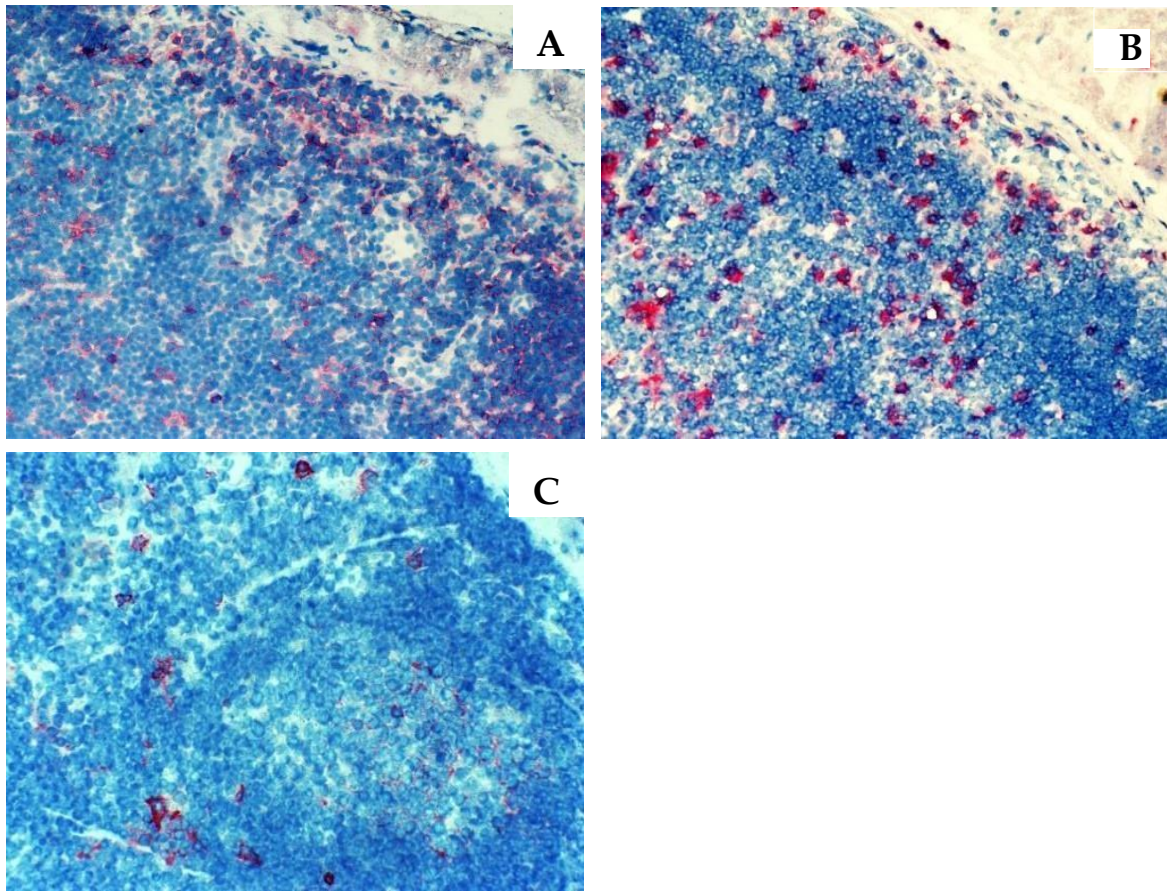

**Figure S2.** Subcapsular sinus of the rat popliteal lymph node stained for the presence of migrating dendritic cells (OX62+, red). A: The node of the control animal receiving 0.9% NaCl (days 1-7, node evaluation on day 8). B: The node after initial massive *S. epidermidis* infection (days 1-7) with early node evaluation (day 8). C: The node after secondary *S. epidermidis* infection (day 28, node evaluation on day 29). Magnification 200 x.

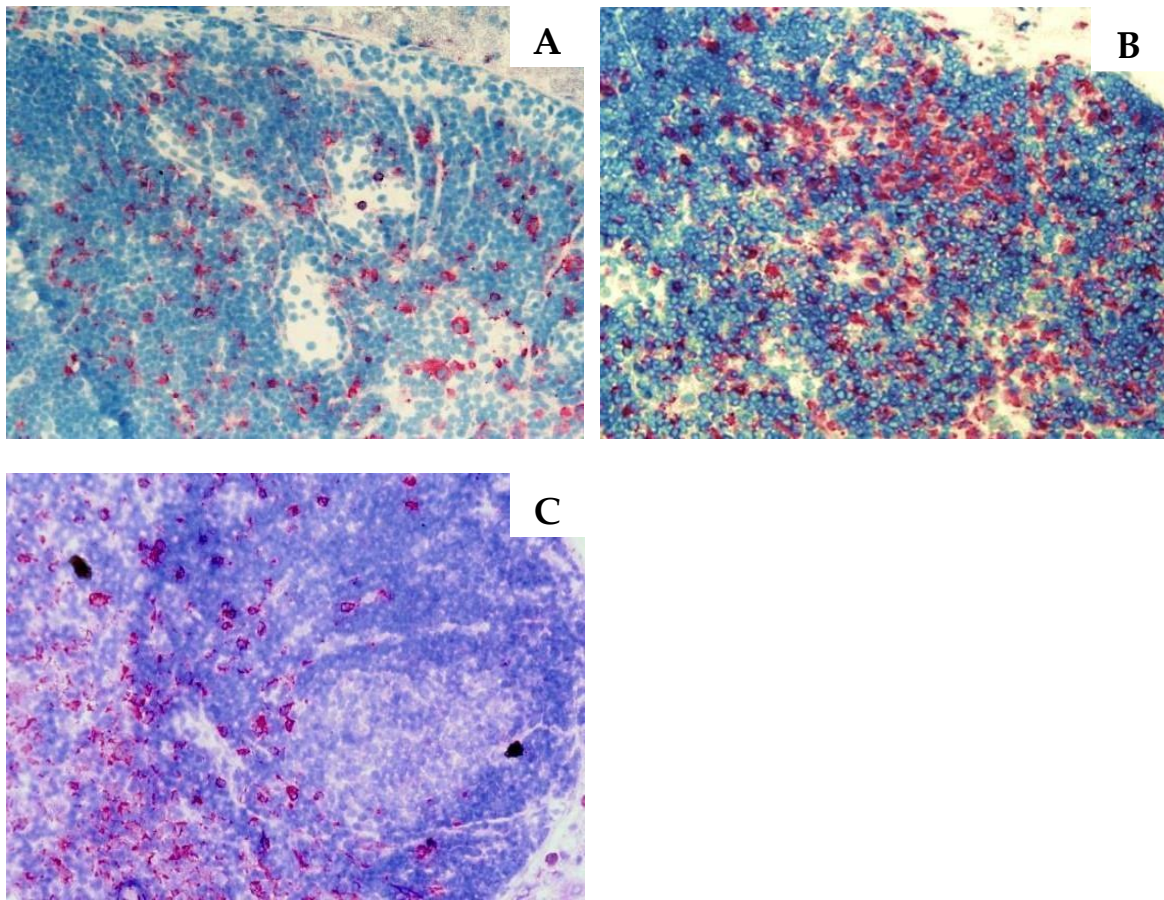

**Figure S3.** Subcapsular sinus of the rat popliteal lymph node stained for the presence of macrophages and monocytes (CD68+, red). A: The node of the control animal receiving 0.9% NaCl (days 1-7, node evaluation on day 8). B: The node after initial massive *S. epidermidis* infection (days 1-7) with early node evaluation (day 8). C: The node after secondary *S. epidermidis* infection (day 28, node evaluation on day 29). Magnification 200 x.



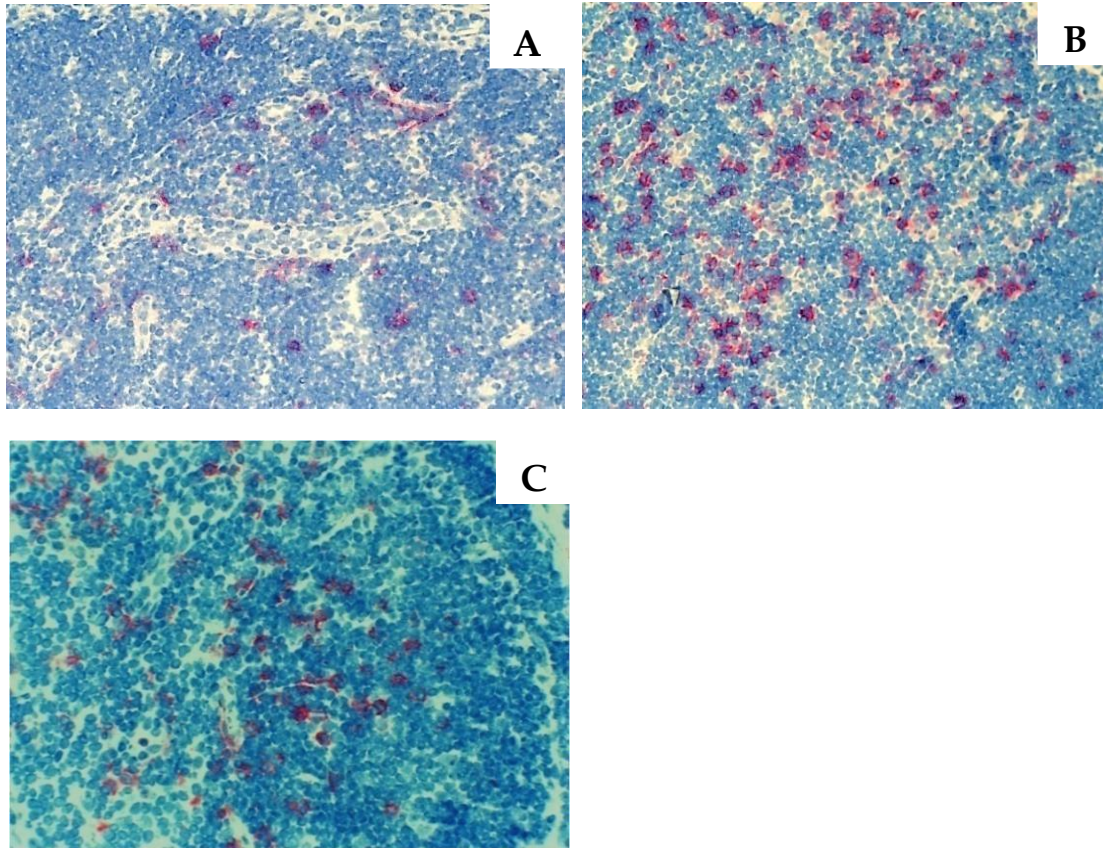

**Figure S4.** Subcapsular sinus of the rat popliteal lymph node stained for the presence of granulocytes (HiS48+, red). A: The node of the control animal receiving 0.9% NaCl (days 1-7, node evaluation on day 8). B: The node after initial massive *S. epidermidis* infection (days 1-7) with early node evaluation (day 8). C: The node after secondary *S. epidermidis* infection (day 28, node evaluation on day 29). Magnification 200 x.

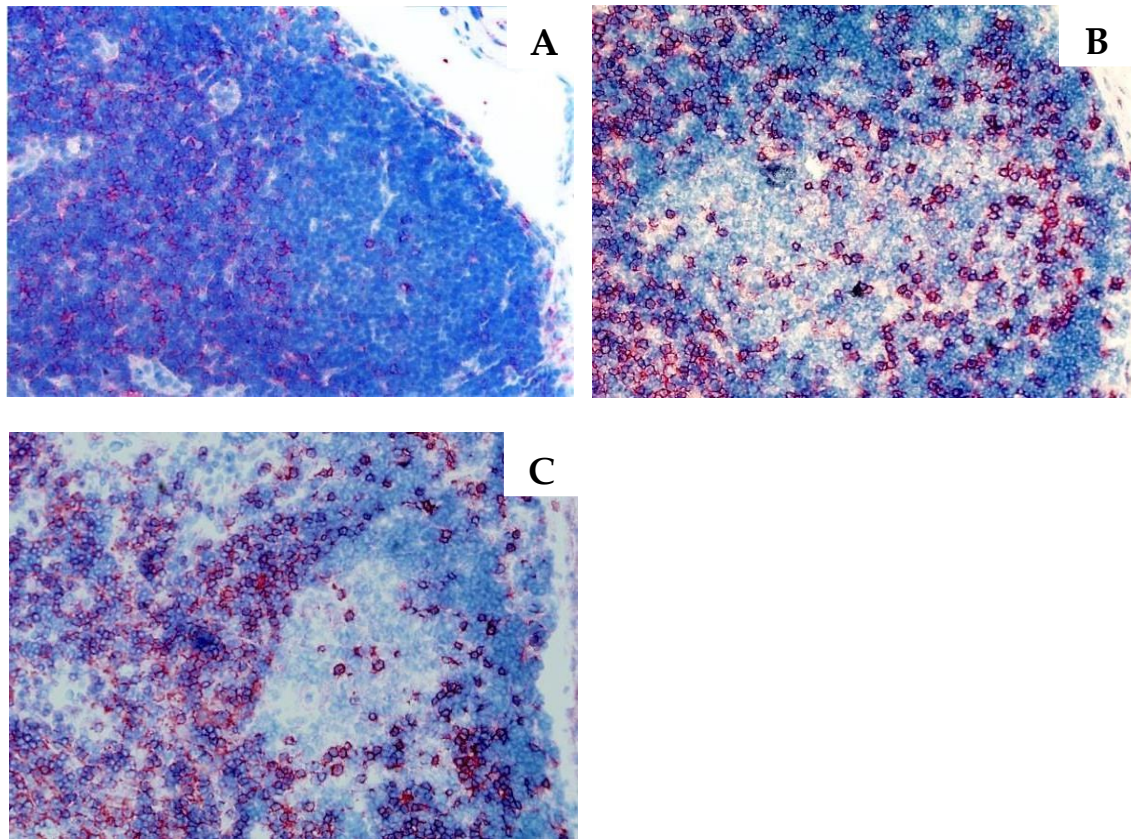

**Figure S5.** The rat popliteal lymph node with the visible follicle stained for the presence of T helper lymphocytes and monocytes (CD4+, red). A: The node of the control animal receiving 0.9% NaCl (days 1-7, node evaluation on day 8). B: The node after initial massive *S. epidermidis* infection (days 1-7) with early node evaluation (day 8). C: The node after secondary *S. epidermidis* infection (day 28, node evaluation on day 29). Magnification 200 x.



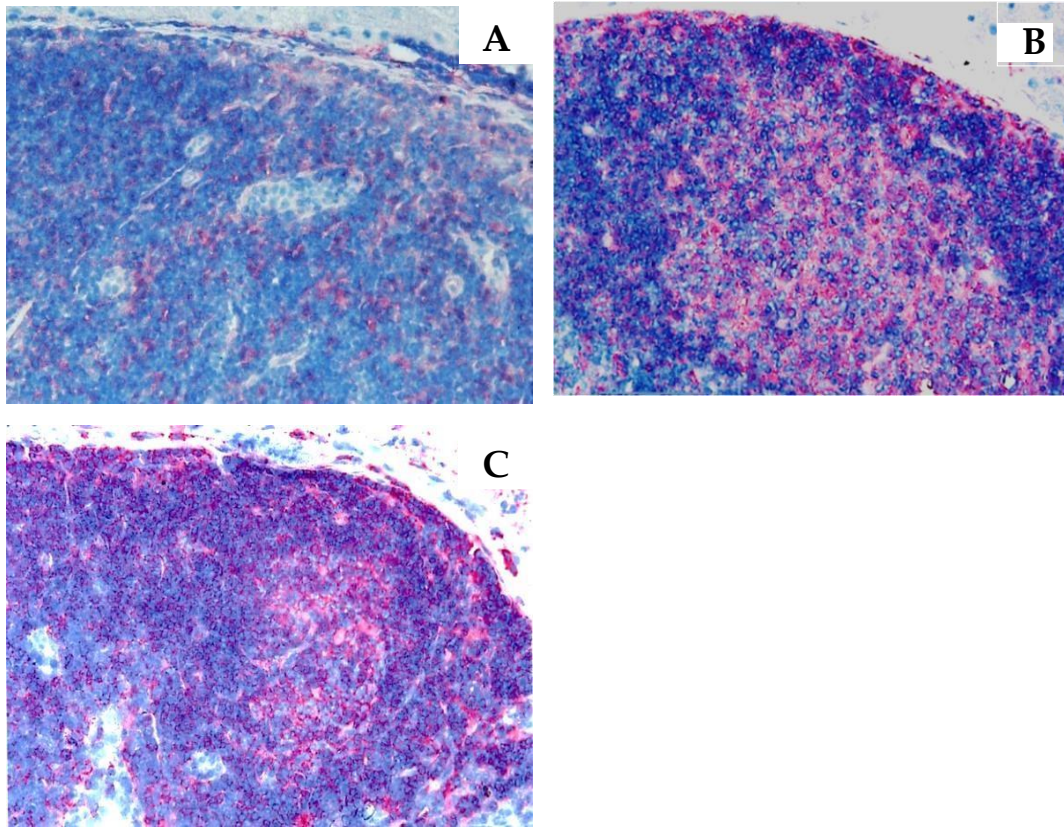

**Figure S6.** The rat popliteal lymph node with the visible follicle stained for the presence of activated antigen-presenting cells (MHC class II+, red). A: The node of the control animal receiving 0.9% NaCl (days 1-7, node evaluation on day 8). B: The node after initial massive *S. epidermidis* infection (days 1-7) with early node evaluation (day 8). C: The node after secondary *S. epidermidis* infection (day 28, node evaluation on day 29). Magnification 200 x.

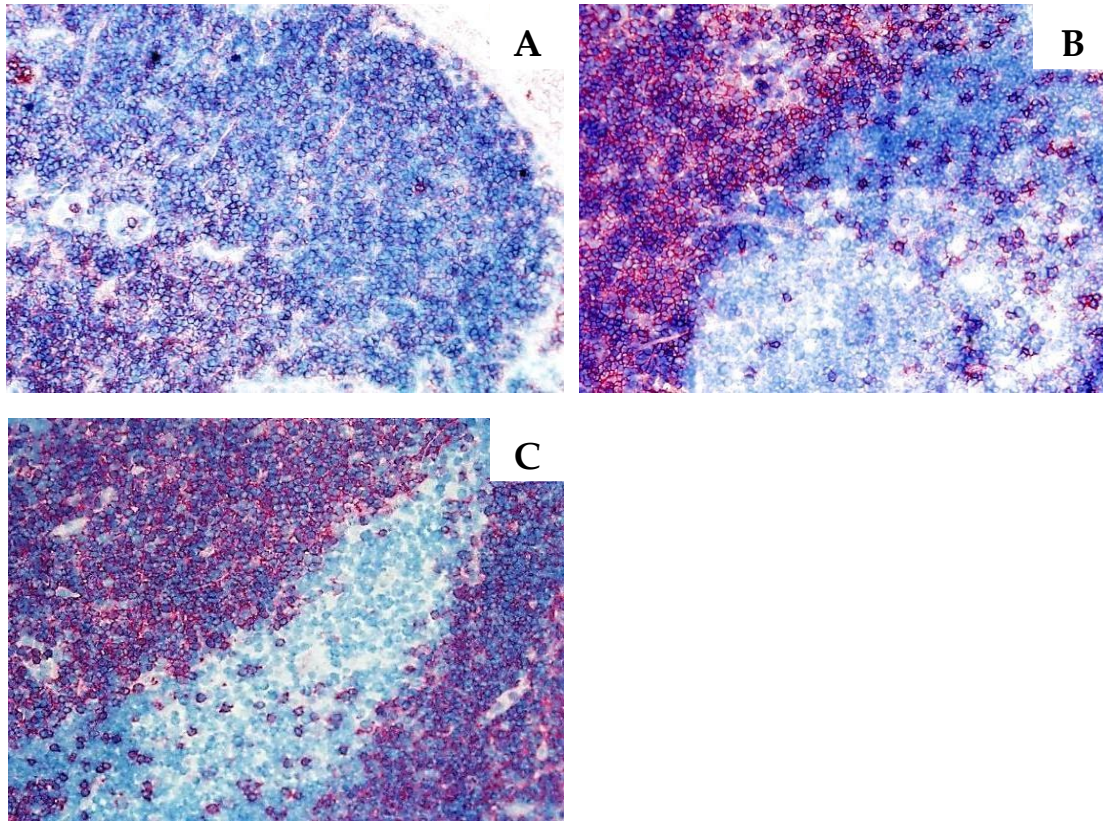

**Figure S7.** Paracortex of the rat popliteal lymph node stained for the presence of T lymphocytes (CD43+, red). A: The node of the control animal receiving 0.9% NaCl (days 1-7, node evaluation on day 8). B: The node after initial massive *S. epidermidis* infection (days 1-7) with early node evaluation (day 8). C: The node after secondary *S. epidermidis* infection (day 28, node evaluation on day 29). Magnification 200 x.



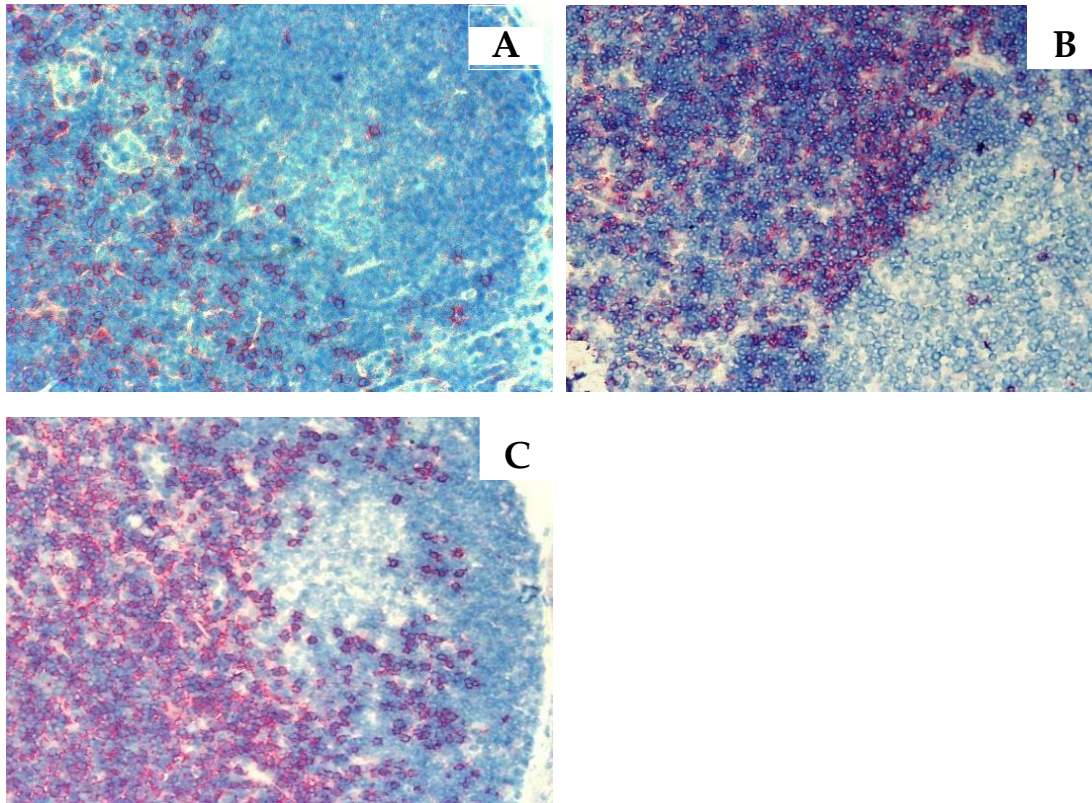

**Figure S8.** Paracortex of the rat popliteal lymph node stained for the presence of T cytotoxic lymphocytes (CD8+, red). A: The node of the control animal receiving 0.9% NaCl (days 1-7, node evaluation on day 8). B: The node after initial massive *S. epidermidis* infection (days 1-7) with early node evaluation (day 8). C: The node after secondary *S. epidermidis* infection (day 28, node evaluation on day 29). Magnification 200 x.

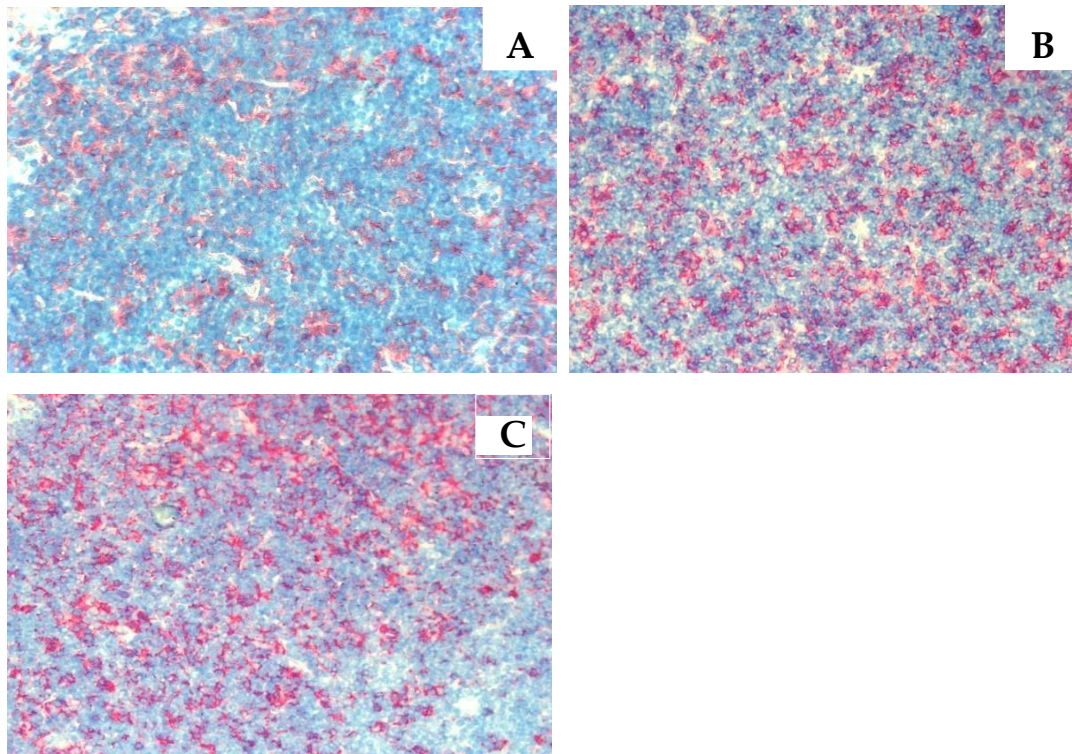

**Figure S9.** Paracortex of the rat popliteal lymph node stained for the presence of activated antigen-presenting cells (MHC class II+, red). A: The node of the control animal receiving 0.9% NaCl (days 1-7, node evaluation on day 8). B: The node after initial massive *S. epidermidis* infection (days 1-7) with early node evaluation (day 8). C: The node after secondary *S. epidermidis* infection (day 28, node evaluation on day 29). Magnification 200 x.

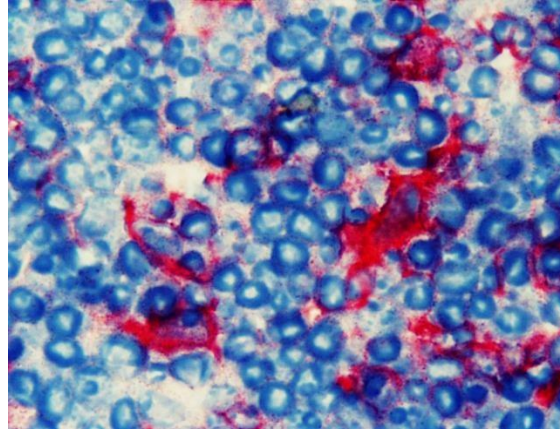

**Figure S10.** Paracortex of the rat popliteal lymph node in initial massive *S. epidermidis* infection (days 1-7) with early node's evaluation (day 8) stained for the presence of large stem cells, thymocytes and immature B cells (CD90+, red). Magnification 1000 x.



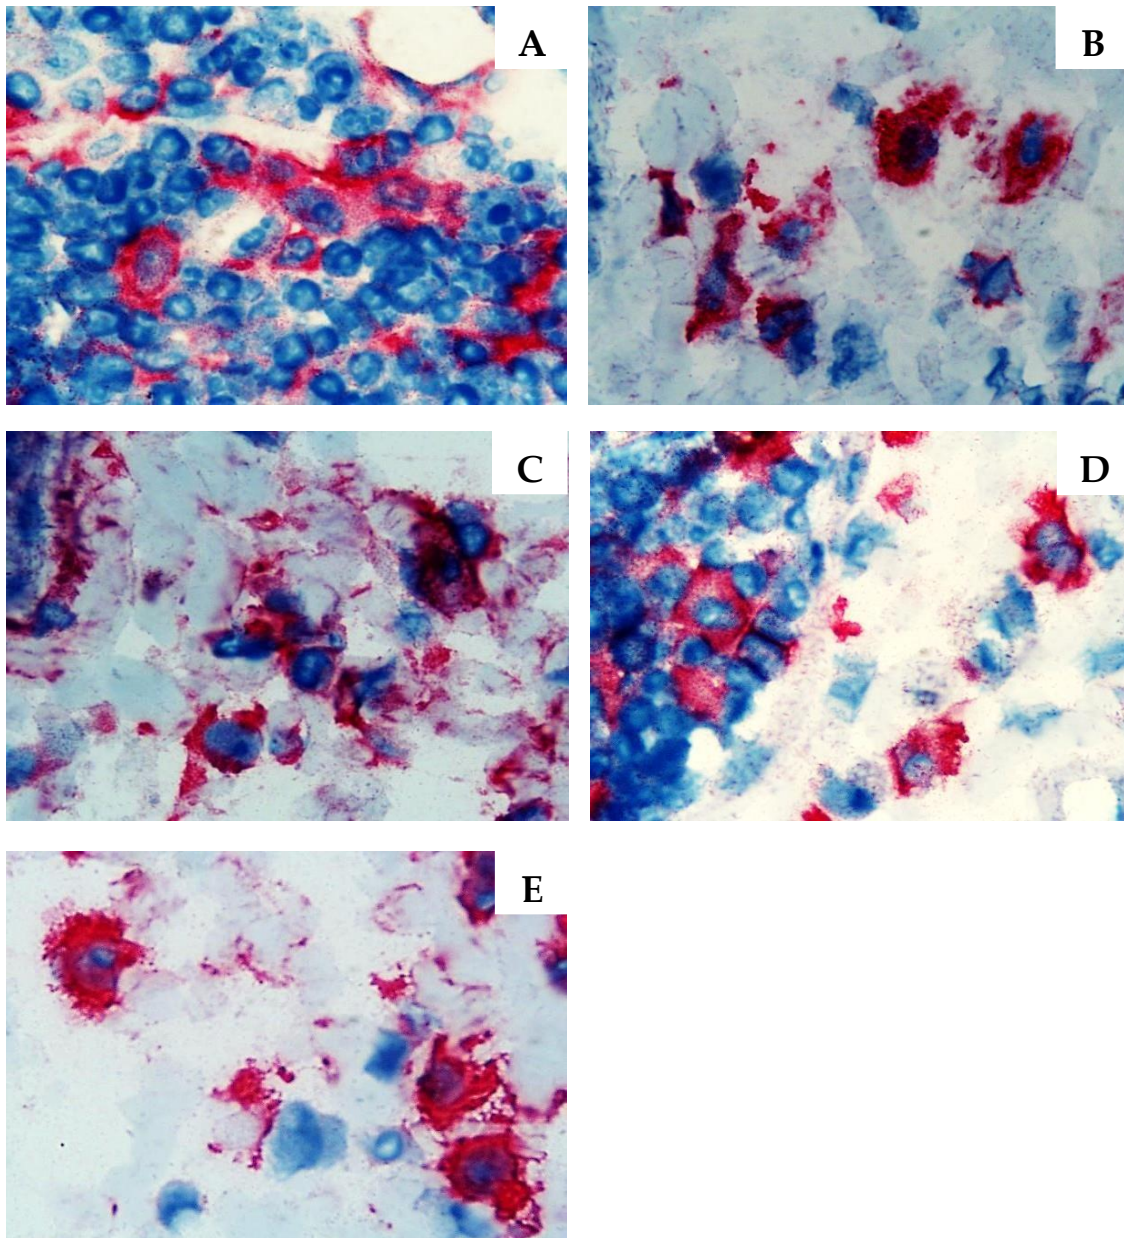

**Figure S11.** The medulla of the rat popliteal lymph node in initial massive *S. epidermidis* infection (days 1-7) with early node's evaluation (day 8). The node stained for: A: Dendritic cells (OX62+, red). B: Macrophages and monocytes (CD68+, red). C: Stem cells, thymocytes and immature B cells (CD90+, red). D: T helper lymphocytes and monocytes (CD4+, red). E: Activated antigen-presenting cells (MHC class II+, red). Magnification 1000 x.
